# Supplementary material
Source: Springer Nature journal article supplement (https://www.springermedizin.de/resource/supplementary/12889_2010_2438_MOESM1_ESM.pdf/9485858)
Supplement: MOESM1 [file 9485858]

**SOCIETAL DETERMINANTS**

**HEALTH SERVICES SYSTEM**

TECHNOLOGY  
NORMS

RESOURCES  
ORGANISATION

**INDIVIDUAL DETERMINANTS**

PREDISPOSING

Age, Marital status, Origin,  
Educational level, Occupational  
status

ENABLING

Income, health insurance  
coverage, receiving, welfare  
benefits, regular obstetrician,  
regular general practitioner

ILLNESS LEVEL

=> PREGNANCY COURSE

Parity, wantedness, planned  
pregnancy, medically assisted  
pregnancy, history of obstetric  
risks, gestational age at  
initiation of care, high risk status  
during antenatal care, continuity  
of care, gestational age at  
delivery

**HEALTH SERVICES UTILIZATION**

TYPE  
PURPOSE  
UNIT OF ANALYSIS
